# Supplementary material for: Long non-coding RNAs as pan-cancer master gene regulators of associated protein-coding genes: a systems biology approach
Source: PubMed Central journal article supplement (PMC6387586; doi:10.7717/peerj.6388), 2019-02-20

# Supplementary fig:

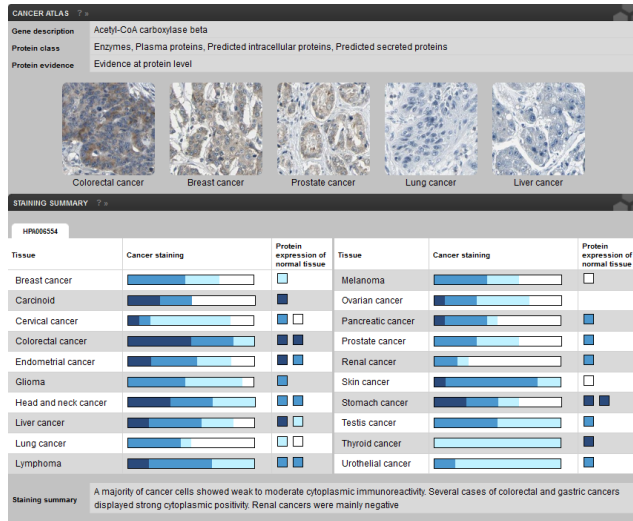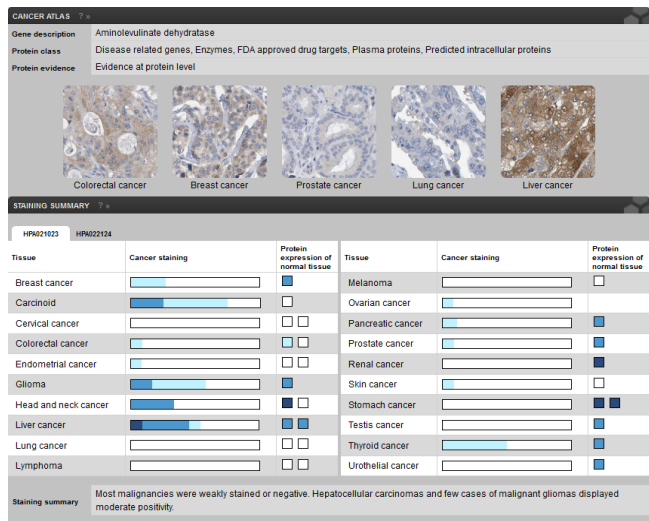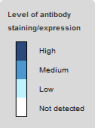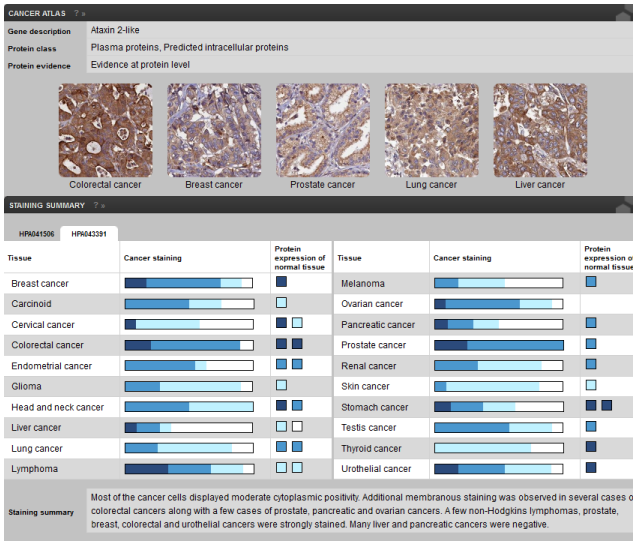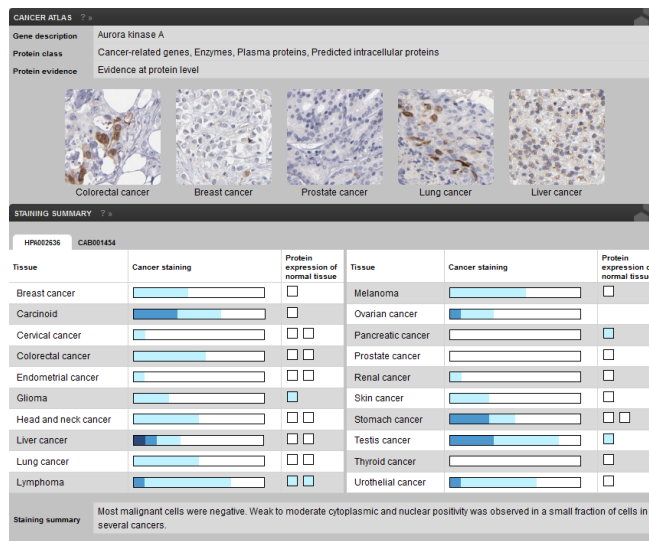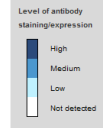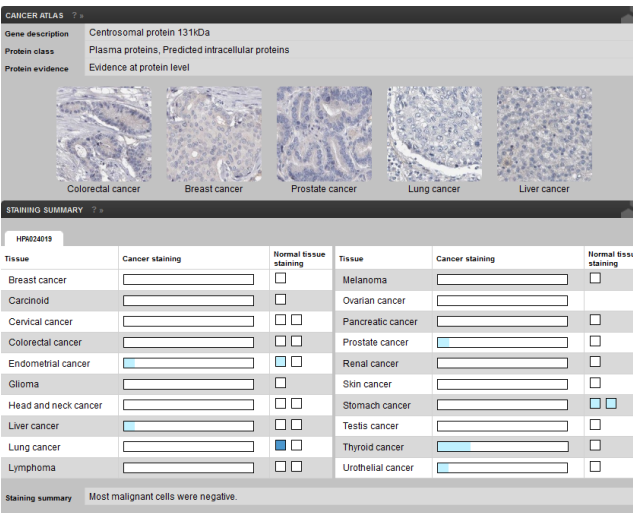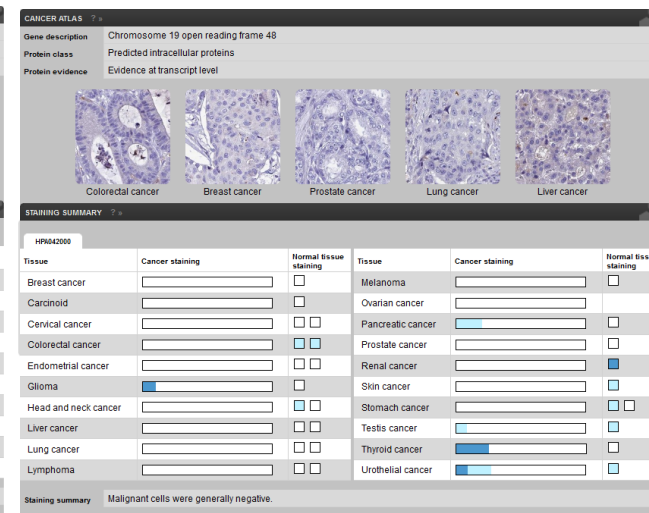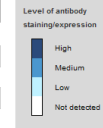

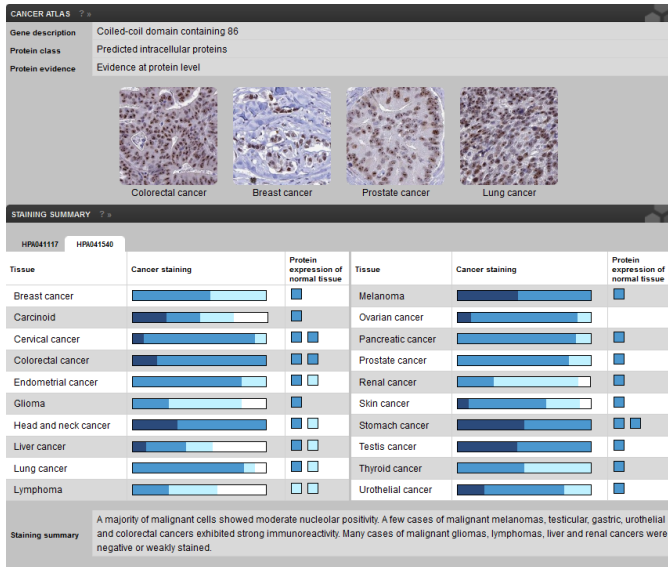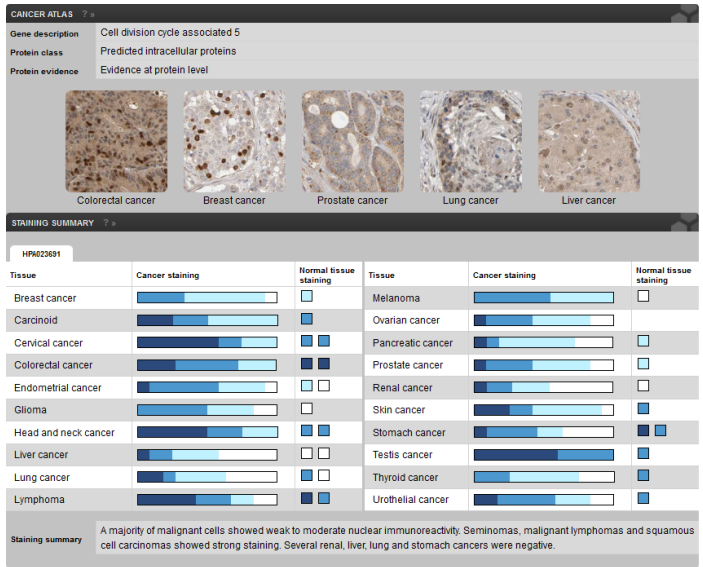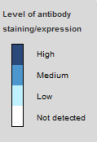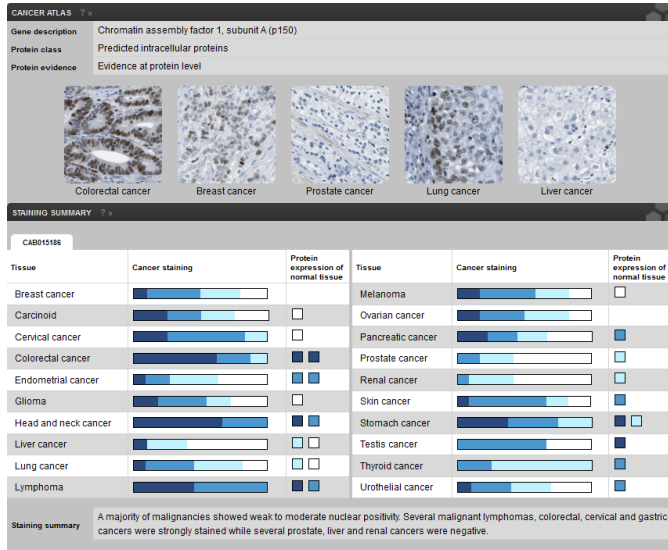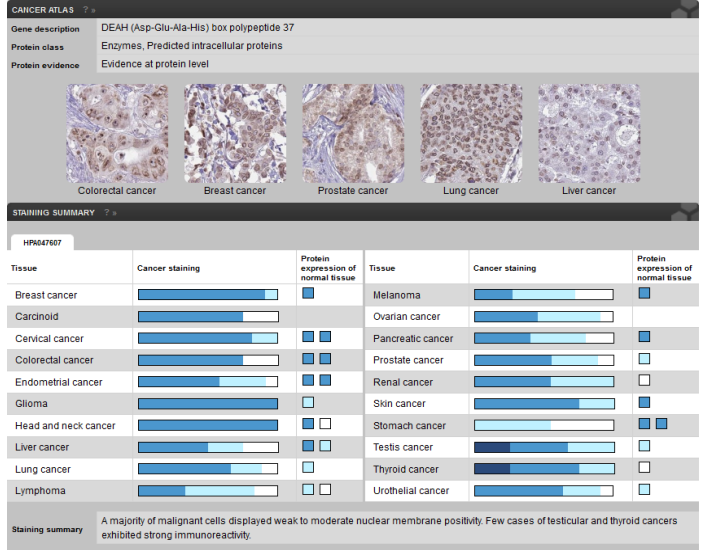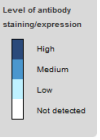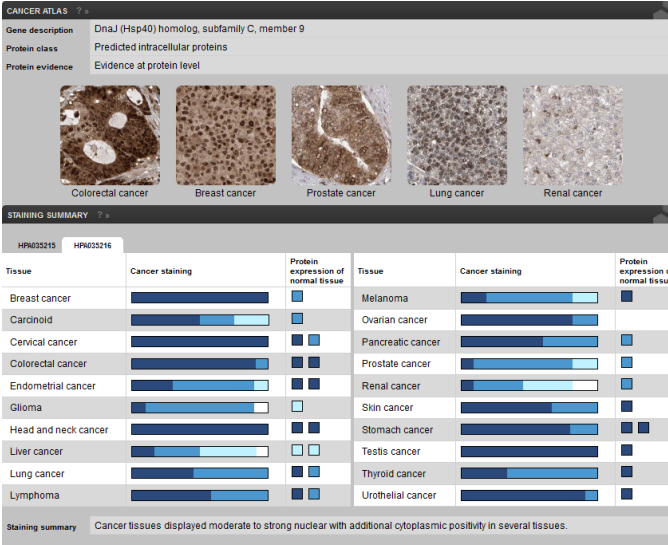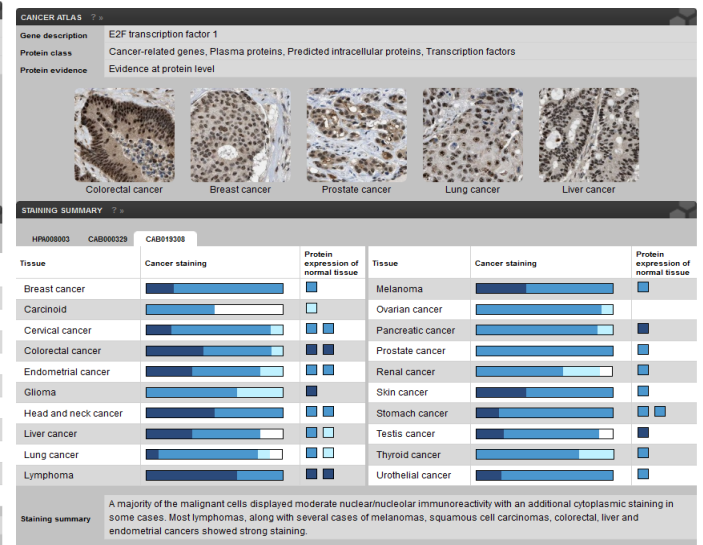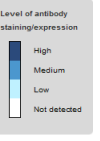

**CANCER ATLAS**

Gene description: Euchromatic histone-lysine N-methyltransferase 2  
 Protein class: Enzymes, Plasma proteins, Predicted intracellular proteins, Predicted secreted proteins  
 Protein evidence: Evidence at protein level

Colorectal cancer Breast cancer Prostate cancer Lung cancer Liver cancer

**STAINING SUMMARY**

HPA05550

| Tissue               | Cancer staining | Protein expression of normal tissue | Tissue            | Cancer staining | Protein expression of normal tissue |
|----------------------|-----------------|-------------------------------------|-------------------|-----------------|-------------------------------------|
| Breast cancer        | Medium          | Not detected                        | Melanoma          | Medium          | Not detected                        |
| Carcinoid            | Medium          | Not detected                        | Ovarian cancer    | Medium          | Not detected                        |
| Cervical cancer      | Medium          | Not detected                        | Pancreatic cancer | Medium          | Not detected                        |
| Colorectal cancer    | Medium          | Not detected                        | Prostate cancer   | Medium          | Not detected                        |
| Endometrial cancer   | Medium          | Not detected                        | Renal cancer      | Medium          | Not detected                        |
| Glioma               | Medium          | Not detected                        | Skin cancer       | Medium          | Not detected                        |
| Head and neck cancer | Medium          | Not detected                        | Stomach cancer    | Medium          | Not detected                        |
| Liver cancer         | Medium          | Not detected                        | Testis cancer     | Medium          | Not detected                        |
| Lung cancer          | Medium          | Not detected                        | Thyroid cancer    | Medium          | Not detected                        |
| Lymphoma             | Medium          | Not detected                        | Urothelial cancer | Medium          | Not detected                        |

Staining summary: Few cases of testis cancers along with occasional cases of head and neck cancers, malignant carcinoids and endometrial cancers exhibited strong nuclear staining. Several cases of malignant gliomas, thyroid, urothelial, skin cancers along with few cases of breast, ovarian, cervix, lung, renal, stomach and pancreatic cancers displayed moderate positivity. Remaining malignant tissues were weakly stained or negative.

**CANCER ATLAS**

Gene description: Flap structure-specific endonuclease 1  
 Protein class: Cancer-related genes, Plasma proteins, Predicted intracellular proteins  
 Protein evidence: Evidence at protein level

Colorectal cancer Breast cancer Prostate cancer Lung cancer Liver cancer

**STAINING SUMMARY**

HPA06748 CAB00262

| Tissue               | Cancer staining | Protein expression of normal tissue | Tissue            | Cancer staining | Protein expression of normal tissue |
|----------------------|-----------------|-------------------------------------|-------------------|-----------------|-------------------------------------|
| Breast cancer        | Medium          | Not detected                        | Melanoma          | Medium          | Not detected                        |
| Carcinoid            | Medium          | Not detected                        | Ovarian cancer    | Medium          | Not detected                        |
| Cervical cancer      | Medium          | Not detected                        | Pancreatic cancer | Medium          | Not detected                        |
| Colorectal cancer    | Medium          | Not detected                        | Prostate cancer   | Medium          | Not detected                        |
| Endometrial cancer   | Medium          | Not detected                        | Renal cancer      | Medium          | Not detected                        |
| Glioma               | Medium          | Not detected                        | Skin cancer       | Medium          | Not detected                        |
| Head and neck cancer | Medium          | Not detected                        | Stomach cancer    | Medium          | Not detected                        |
| Liver cancer         | Medium          | Not detected                        | Testis cancer     | Medium          | Not detected                        |
| Lung cancer          | Medium          | Not detected                        | Thyroid cancer    | Medium          | Not detected                        |
| Lymphoma             | Medium          | Not detected                        | Urothelial cancer | Medium          | Not detected                        |

Staining summary: A majority of malignant tissues displayed moderate to strong nuclear immunoreactivity. Several renal cancers were weakly stained or negative.

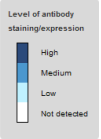

**CANCER ATLAS**

Gene description: Forkhead box M1  
 Protein class: Cancer-related genes, Predicted intracellular proteins, Transcription factors  
 Protein evidence: Evidence at protein level

Colorectal cancer Breast cancer Prostate cancer Lung cancer Liver cancer

**STAINING SUMMARY**

HPA02974 HPA02975 HPA02976 CAB017832

| Tissue               | Cancer staining | Protein expression of normal tissue | Tissue            | Cancer staining | Protein expression of normal tissue |
|----------------------|-----------------|-------------------------------------|-------------------|-----------------|-------------------------------------|
| Breast cancer        | Medium          | Not detected                        | Melanoma          | Medium          | Not detected                        |
| Carcinoid            | Medium          | Not detected                        | Ovarian cancer    | Medium          | Not detected                        |
| Cervical cancer      | Medium          | Not detected                        | Pancreatic cancer | Medium          | Not detected                        |
| Colorectal cancer    | Medium          | Not detected                        | Prostate cancer   | Medium          | Not detected                        |
| Endometrial cancer   | Medium          | Not detected                        | Renal cancer      | Medium          | Not detected                        |
| Glioma               | Medium          | Not detected                        | Skin cancer       | Medium          | Not detected                        |
| Head and neck cancer | Medium          | Not detected                        | Stomach cancer    | Medium          | Not detected                        |
| Liver cancer         | Medium          | Not detected                        | Testis cancer     | Medium          | Not detected                        |
| Lung cancer          | Medium          | Not detected                        | Thyroid cancer    | Medium          | Not detected                        |
| Lymphoma             | Medium          | Not detected                        | Urothelial cancer | Medium          | Not detected                        |

Staining summary: Malignant cells exhibited moderate nuclear and cytoplasmic immunoreactivity. Many cases of renal, cervical and ovarian cancers as well as a few cases of colorectal and gastric cancers showed strong nuclear staining. Most hepatocellular carcinomas were weakly stained.

**CANCER ATLAS**

Gene description: Forkhead box N3  
 Protein class: Predicted intracellular proteins, Transcription factors  
 Protein evidence: Evidence at protein level

Colorectal cancer Breast cancer Prostate cancer Lung cancer Liver cancer

**STAINING SUMMARY**

HPA05909

| Tissue               | Cancer staining | Protein expression of normal tissue | Tissue            | Cancer staining | Protein expression of normal tissue |
|----------------------|-----------------|-------------------------------------|-------------------|-----------------|-------------------------------------|
| Breast cancer        | Medium          | Not detected                        | Melanoma          | Medium          | Not detected                        |
| Carcinoid            | Medium          | Not detected                        | Ovarian cancer    | Medium          | Not detected                        |
| Cervical cancer      | Medium          | Not detected                        | Pancreatic cancer | Medium          | Not detected                        |
| Colorectal cancer    | Medium          | Not detected                        | Prostate cancer   | Medium          | Not detected                        |
| Endometrial cancer   | Medium          | Not detected                        | Renal cancer      | Medium          | Not detected                        |
| Glioma               | Medium          | Not detected                        | Skin cancer       | Medium          | Not detected                        |
| Head and neck cancer | Medium          | Not detected                        | Stomach cancer    | Medium          | Not detected                        |
| Liver cancer         | Medium          | Not detected                        | Testis cancer     | Medium          | Not detected                        |
| Lung cancer          | Medium          | Not detected                        | Thyroid cancer    | Medium          | Not detected                        |
| Lymphoma             | Medium          | Not detected                        | Urothelial cancer | Medium          | Not detected                        |

Staining summary: Most cancer cells displayed moderate cytoplasmic and/or nuclear immunoreactivity. Many prostate, testis, renal, stomach, pancreatic and liver cancers were negative.

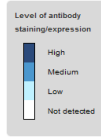

**CANCER ATLAS**

Gene description: Solute carrier family 52 (riboflavin transporter), member 2  
 Protein class: Disease related genes, FDA approved drug targets, Predicted membrane proteins, Predicted secreted proteins, Transporters  
 Protein evidence: Evidence at protein level

Colorectal cancer Breast cancer Prostate cancer Lung cancer Liver cancer

**STAINING SUMMARY**

HPA06306

| Tissue               | Cancer staining | Normal tissue staining | Tissue            | Cancer staining | Normal tissue staining |
|----------------------|-----------------|------------------------|-------------------|-----------------|------------------------|
| Breast cancer        | Medium          | Not detected           | Melanoma          | Medium          | Not detected           |
| Carcinoid            | Medium          | Not detected           | Ovarian cancer    | Medium          | Not detected           |
| Cervical cancer      | Medium          | Not detected           | Pancreatic cancer | Medium          | Not detected           |
| Colorectal cancer    | Medium          | Not detected           | Prostate cancer   | Medium          | Not detected           |
| Endometrial cancer   | Medium          | Not detected           | Renal cancer      | Medium          | Not detected           |
| Glioma               | Medium          | Not detected           | Skin cancer       | Medium          | Not detected           |
| Head and neck cancer | Medium          | Not detected           | Stomach cancer    | Medium          | Not detected           |
| Liver cancer         | Medium          | Not detected           | Testis cancer     | Medium          | Not detected           |
| Lung cancer          | Medium          | Not detected           | Thyroid cancer    | Medium          | Not detected           |
| Lymphoma             | Medium          | Not detected           | Urothelial cancer | Medium          | Not detected           |

Staining summary: Most cancer tissues showed weak to moderate cytoplasmic positivity with additional membranous and/or nuclear staining. Few cases of colorectal, stomach and ovarian cancers displayed strong immunoreactivity. Thyroid cancers along with several renal and liver cancers were negative.

**CANCER ATLAS**

Gene description: GTP binding protein 3 (mitochondrial)  
 Protein class: Mitochondrial proteins, Predicted intracellular proteins  
 Protein evidence: Evidence at protein level

Colorectal cancer Breast cancer Prostate cancer Lung cancer

**STAINING SUMMARY**

HPA04158

| Tissue               | Cancer staining | Protein expression of normal tissue | Tissue            | Cancer staining | Protein expression of normal tissue |
|----------------------|-----------------|-------------------------------------|-------------------|-----------------|-------------------------------------|
| Breast cancer        | Medium          | Not detected                        | Melanoma          | Medium          | Not detected                        |
| Carcinoid            | Medium          | Not detected                        | Ovarian cancer    | Medium          | Not detected                        |
| Cervical cancer      | Medium          | Not detected                        | Pancreatic cancer | Medium          | Not detected                        |
| Colorectal cancer    | Medium          | Not detected                        | Prostate cancer   | Medium          | Not detected                        |
| Endometrial cancer   | Medium          | Not detected                        | Renal cancer      | Medium          | Not detected                        |
| Glioma               | Medium          | Not detected                        | Skin cancer       | Medium          | Not detected                        |
| Head and neck cancer | Medium          | Not detected                        | Stomach cancer    | Medium          | Not detected                        |
| Liver cancer         | Medium          | Not detected                        | Testis cancer     | Medium          | Not detected                        |
| Lung cancer          | Medium          | Not detected                        | Thyroid cancer    | Medium          | Not detected                        |
| Lymphoma             | Medium          | Not detected                        | Urothelial cancer | Medium          | Not detected                        |

Staining summary: Cancer cells displayed moderate to strong cytoplasmic positivity with a granular pattern.

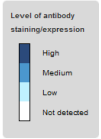

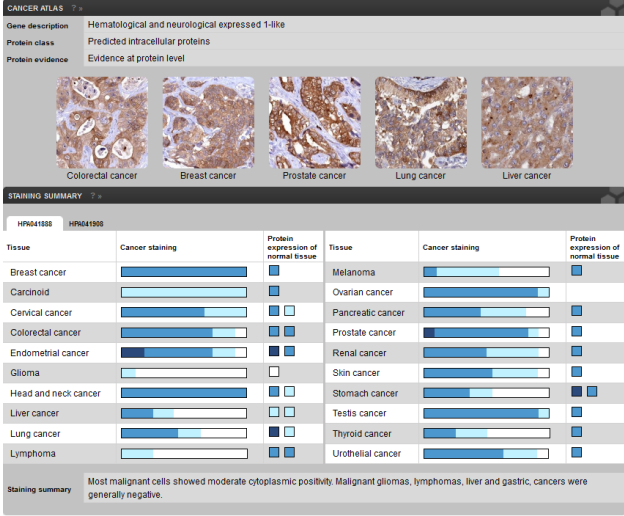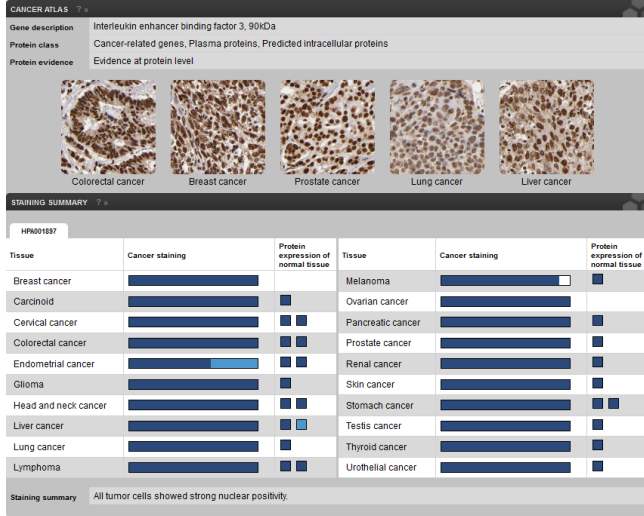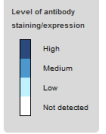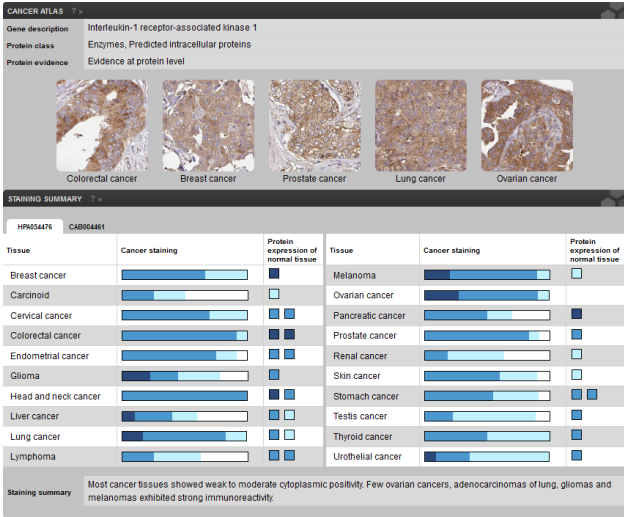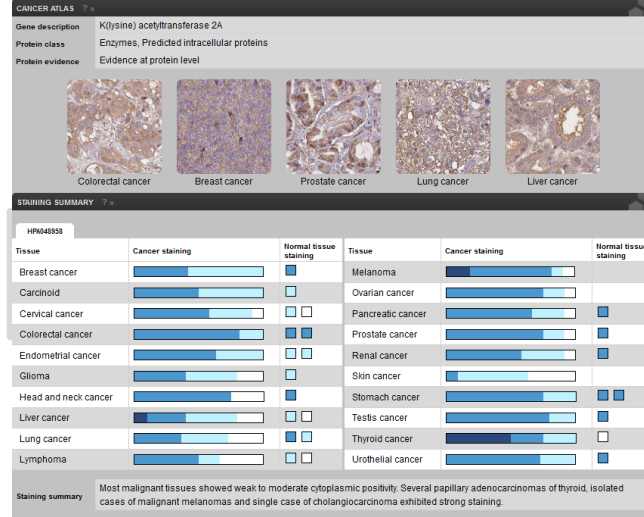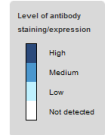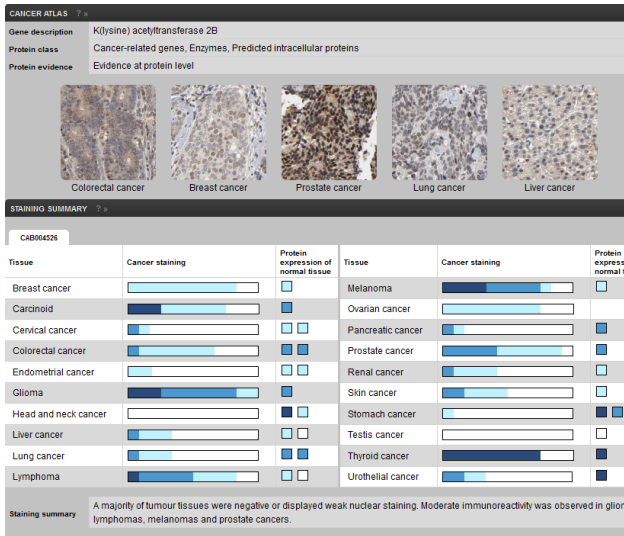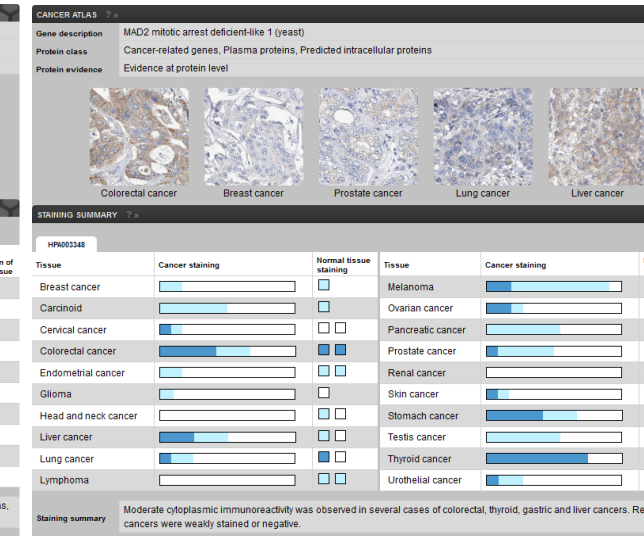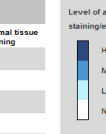

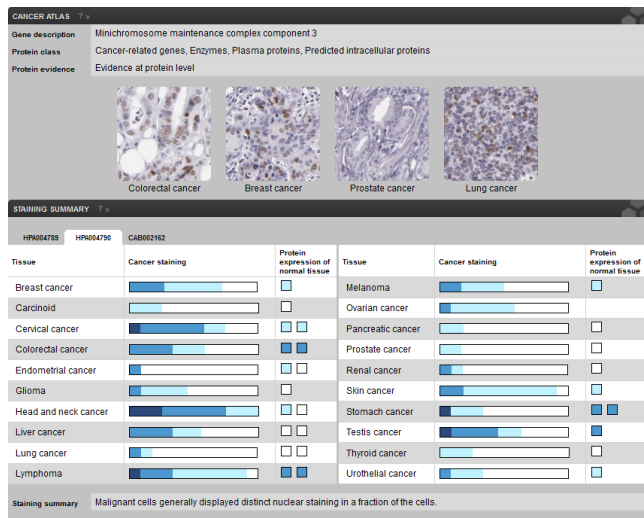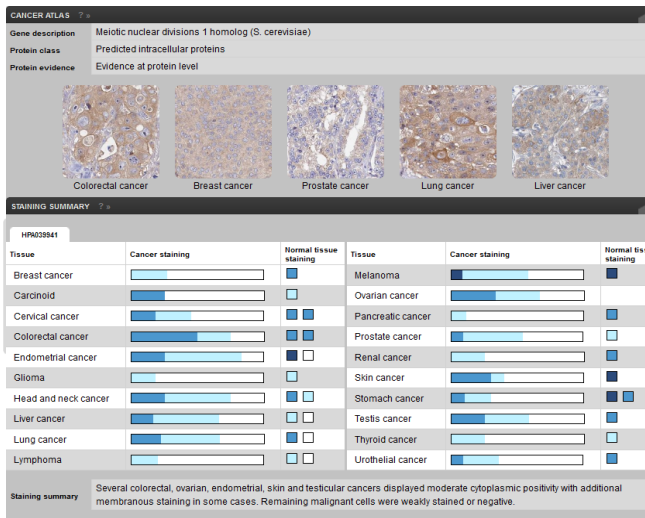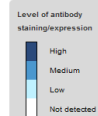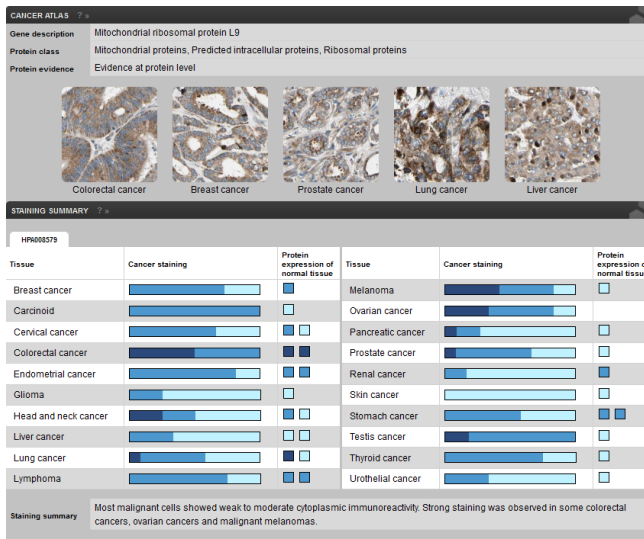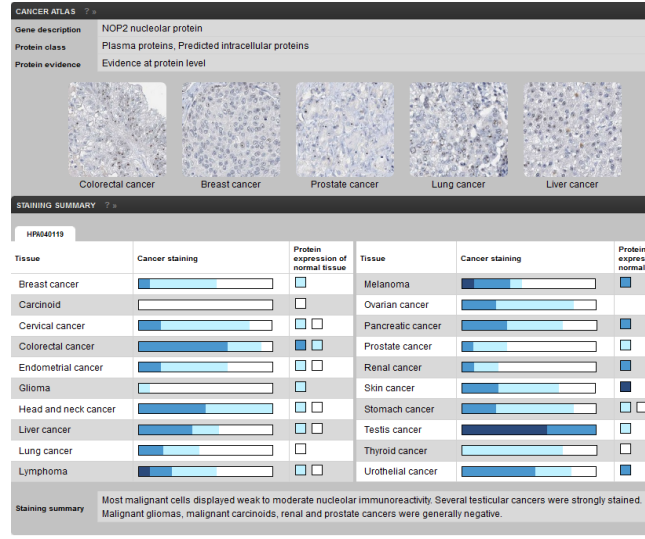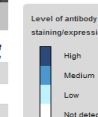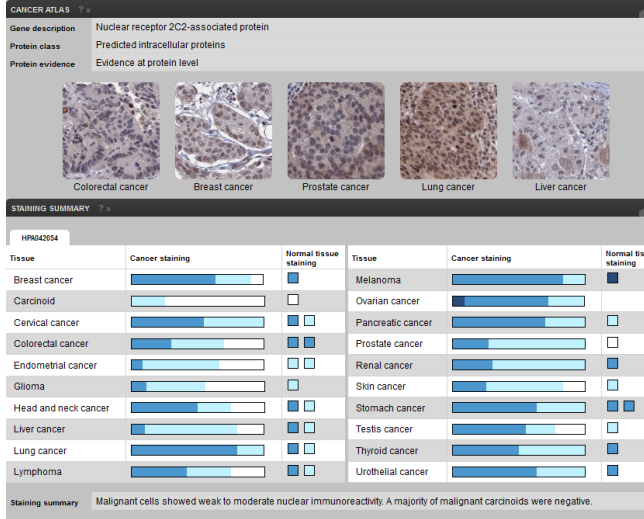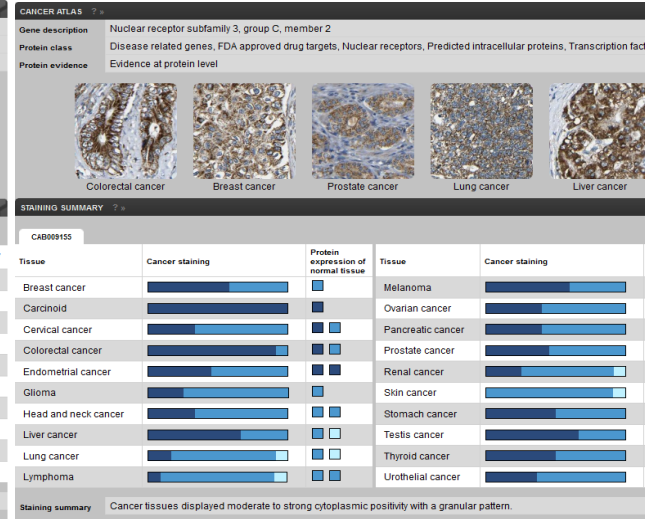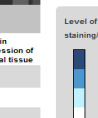

**CANCER ATLAS**

Gene description: NOP2/Sun domain family, member 5  
 Protein class: Disease related genes, Predicted intracellular proteins  
 Protein evidence: Evidence at protein level

Colorectal cancer Breast cancer Prostate cancer Lung cancer Liver cancer

**STAINING SUMMARY**

HPM02936

| Tissue               | Cancer staining | Normal tissue staining | Tissue            | Cancer staining | Normal tissue staining |
|----------------------|-----------------|------------------------|-------------------|-----------------|------------------------|
| Breast cancer        | Low             | Not detected           | Melanoma          | Low             | Not detected           |
| Cardioid             | Not detected    | Not detected           | Ovarian cancer    | Low             | Not detected           |
| Cervical cancer      | Low             | Not detected           | Pancreatic cancer | Low             | Not detected           |
| Colorectal cancer    | Low             | Not detected           | Prostate cancer   | Low             | Not detected           |
| Endometrial cancer   | Low             | Not detected           | Renal cancer      | Low             | Not detected           |
| Glioma               | Low             | Not detected           | Skin cancer       | Low             | Not detected           |
| Head and neck cancer | Low             | Not detected           | Stomach cancer    | Low             | Not detected           |
| Liver cancer         | Low             | Not detected           | Testis cancer     | Low             | Not detected           |
| Lung cancer          | Low             | Not detected           | Thyroid cancer    | Low             | Not detected           |
| Lymphoma             | Low             | Not detected           | Urothelial cancer | Low             | Not detected           |

Staining summary: A majority of malignancies were weakly stained or negative. Strong nuclear and cytoplasmic positivity was observed in prostate cancers. Moderate to strong nuclear and/or cytoplasmic staining was observed in several malignant melanomas, breast and liver cancers.

**CANCER ATLAS**

Gene description: Nuclaporin 85kDa  
 Protein class: Cytoskeleton related proteins, Predicted intracellular proteins, Predicted secreted proteins  
 Protein evidence: Evidence at protein level

Colorectal cancer Breast cancer Prostate cancer Lung cancer Liver cancer

**STAINING SUMMARY**

HPM02595

| Tissue               | Cancer staining | Protein expression of normal tissue | Tissue            | Cancer staining | Protein expression of normal tissue |
|----------------------|-----------------|-------------------------------------|-------------------|-----------------|-------------------------------------|
| Breast cancer        | Low             | Not detected                        | Melanoma          | Low             | Not detected                        |
| Cardioid             | Low             | Not detected                        | Ovarian cancer    | Low             | Not detected                        |
| Cervical cancer      | Low             | Not detected                        | Pancreatic cancer | Low             | Not detected                        |
| Colorectal cancer    | Low             | Not detected                        | Prostate cancer   | Low             | Not detected                        |
| Endometrial cancer   | Low             | Not detected                        | Renal cancer      | Low             | Not detected                        |
| Glioma               | Low             | Not detected                        | Skin cancer       | Low             | Not detected                        |
| Head and neck cancer | Low             | Not detected                        | Stomach cancer    | Low             | Not detected                        |
| Liver cancer         | Low             | Not detected                        | Testis cancer     | Low             | Not detected                        |
| Lung cancer          | Low             | Not detected                        | Thyroid cancer    | Low             | Not detected                        |
| Lymphoma             | Low             | Not detected                        | Urothelial cancer | Low             | Not detected                        |

Staining summary: Most cancer tissues showed weak to moderate nucleolar immunoreactivity. Few cases of melanomas, squamous cell carcinomas of skin and testicular cancers were strongly stained.

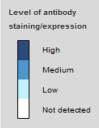

**CANCER ATLAS**

Gene description: Nuclear transport factor 2  
 Protein class: Plasma proteins, Predicted intracellular proteins  
 Protein evidence: Evidence at protein level

Colorectal cancer Breast cancer Prostate cancer Lung cancer Liver cancer

**STAINING SUMMARY**

HPM04915 HPM04936

| Tissue               | Cancer staining | Protein expression of normal tissue | Tissue            | Cancer staining | Protein expression of normal tissue |
|----------------------|-----------------|-------------------------------------|-------------------|-----------------|-------------------------------------|
| Breast cancer        | Low             | Not detected                        | Melanoma          | Low             | Not detected                        |
| Cardioid             | Low             | Not detected                        | Ovarian cancer    | Low             | Not detected                        |
| Cervical cancer      | Low             | Not detected                        | Pancreatic cancer | Low             | Not detected                        |
| Colorectal cancer    | Low             | Not detected                        | Prostate cancer   | Low             | Not detected                        |
| Endometrial cancer   | Low             | Not detected                        | Renal cancer      | Low             | Not detected                        |
| Glioma               | Low             | Not detected                        | Skin cancer       | Low             | Not detected                        |
| Head and neck cancer | Low             | Not detected                        | Stomach cancer    | Low             | Not detected                        |
| Liver cancer         | Low             | Not detected                        | Testis cancer     | Low             | Not detected                        |
| Lung cancer          | Low             | Not detected                        | Thyroid cancer    | Low             | Not detected                        |
| Lymphoma             | Low             | Not detected                        | Urothelial cancer | Low             | Not detected                        |

Staining summary: Most malignant cells showed weak to moderate cytoplasmic and occasional membranous immunoreactivity. A rare case of malignant glioma showed strong cytoplasmic positivity. Malignant lymphomas, cervical, lung, liver, renal, urothelial and gastric cancers were generally negative.

**CANCER ATLAS**

Gene description: Nucleic acid binding protein 2  
 Protein class: Predicted intracellular proteins  
 Protein evidence: Evidence at protein level

Colorectal cancer Breast cancer Prostate cancer Lung cancer Liver cancer

**STAINING SUMMARY**

HPM04615

| Tissue               | Cancer staining | Protein expression of normal tissue | Tissue            | Cancer staining | Protein expression of normal tissue |
|----------------------|-----------------|-------------------------------------|-------------------|-----------------|-------------------------------------|
| Breast cancer        | Low             | Not detected                        | Melanoma          | Low             | Not detected                        |
| Cardioid             | Low             | Not detected                        | Ovarian cancer    | Low             | Not detected                        |
| Cervical cancer      | Low             | Not detected                        | Pancreatic cancer | Low             | Not detected                        |
| Colorectal cancer    | Low             | Not detected                        | Prostate cancer   | Low             | Not detected                        |
| Endometrial cancer   | Low             | Not detected                        | Renal cancer      | Low             | Not detected                        |
| Glioma               | Low             | Not detected                        | Skin cancer       | Low             | Not detected                        |
| Head and neck cancer | Low             | Not detected                        | Stomach cancer    | Low             | Not detected                        |
| Liver cancer         | Low             | Not detected                        | Testis cancer     | Low             | Not detected                        |
| Lung cancer          | Low             | Not detected                        | Thyroid cancer    | Low             | Not detected                        |
| Lymphoma             | Low             | Not detected                        | Urothelial cancer | Low             | Not detected                        |

Staining summary: Most malignant cells showed weak to moderate nuclear positivity. Many malignant melanomas along with cases of urothelial, gastric and pancreatic cancers were strongly stained. A majority of malignant lymphomas and endometrial cancers were negative.

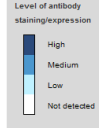

**CANCER ATLAS**

Gene description: Origin recognition complex, subunit 6  
 Protein class: Disease related genes, Predicted intracellular proteins  
 Protein evidence: Evidence at protein level

Colorectal cancer Breast cancer Prostate cancer Lung cancer Liver cancer

**STAINING SUMMARY**

CAB016330

| Tissue               | Cancer staining | Protein expression of normal tissue | Tissue            | Cancer staining | Protein expression of normal tissue |
|----------------------|-----------------|-------------------------------------|-------------------|-----------------|-------------------------------------|
| Breast cancer        | Low             | Not detected                        | Melanoma          | Low             | Not detected                        |
| Cardioid             | Low             | Not detected                        | Ovarian cancer    | Low             | Not detected                        |
| Cervical cancer      | Low             | Not detected                        | Pancreatic cancer | Low             | Not detected                        |
| Colorectal cancer    | Low             | Not detected                        | Prostate cancer   | Low             | Not detected                        |
| Endometrial cancer   | Low             | Not detected                        | Renal cancer      | Low             | Not detected                        |
| Glioma               | Low             | Not detected                        | Skin cancer       | Low             | Not detected                        |
| Head and neck cancer | Low             | Not detected                        | Stomach cancer    | Low             | Not detected                        |
| Liver cancer         | Low             | Not detected                        | Testis cancer     | Low             | Not detected                        |
| Lung cancer          | Low             | Not detected                        | Thyroid cancer    | Low             | Not detected                        |
| Lymphoma             | Low             | Not detected                        | Urothelial cancer | Low             | Not detected                        |

Staining summary: A majority of malignancies showed weak to moderate nuclear positivity combined with cases of cytoplasmic staining. Prostate and renal cancers were generally negative.

**CANCER ATLAS**

Gene description: Polycomb group ring finger 5  
 Protein class: Predicted intracellular proteins  
 Protein evidence: Evidence at protein level

Colorectal cancer Breast cancer Prostate cancer Lung cancer Liver cancer

**STAINING SUMMARY**

HPM03849

| Tissue               | Cancer staining | Normal tissue staining | Tissue            | Cancer staining | Normal tissue staining |
|----------------------|-----------------|------------------------|-------------------|-----------------|------------------------|
| Breast cancer        | Low             | Not detected           | Melanoma          | Low             | Not detected           |
| Cardioid             | Low             | Not detected           | Ovarian cancer    | Low             | Not detected           |
| Cervical cancer      | Low             | Not detected           | Pancreatic cancer | Low             | Not detected           |
| Colorectal cancer    | Low             | Not detected           | Prostate cancer   | Low             | Not detected           |
| Endometrial cancer   | Low             | Not detected           | Renal cancer      | Low             | Not detected           |
| Glioma               | Low             | Not detected           | Skin cancer       | Low             | Not detected           |
| Head and neck cancer | Low             | Not detected           | Stomach cancer    | Low             | Not detected           |
| Liver cancer         | Low             | Not detected           | Testis cancer     | Low             | Not detected           |
| Lung cancer          | Low             | Not detected           | Thyroid cancer    | Low             | Not detected           |
| Lymphoma             | Low             | Not detected           | Urothelial cancer | Low             | Not detected           |

Staining summary: A fraction of cases in most malignancies showed moderate nucleolar immunoreactivity. Malignant carcinoid and cervical cancers were negative.

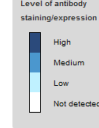

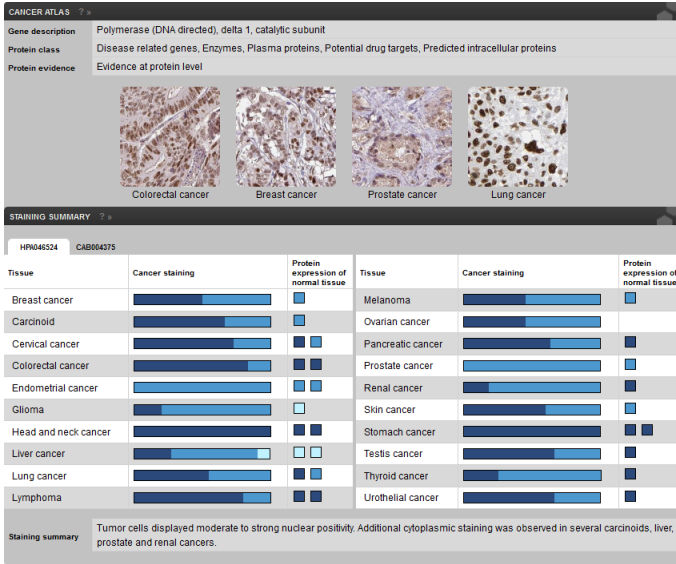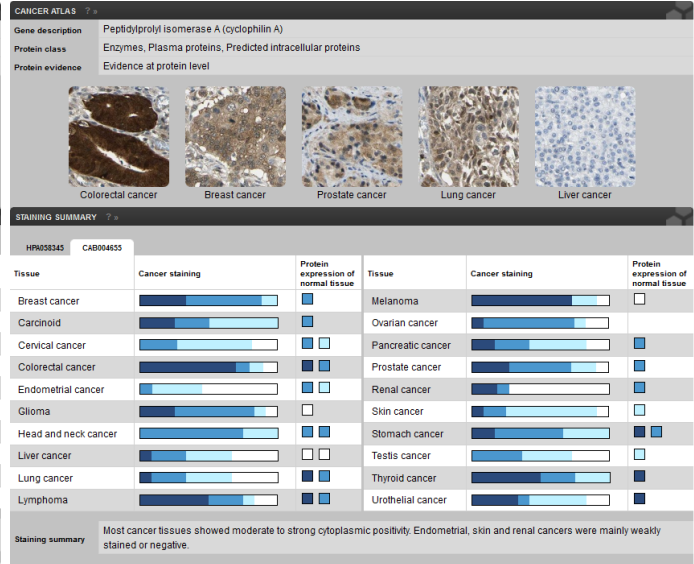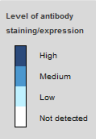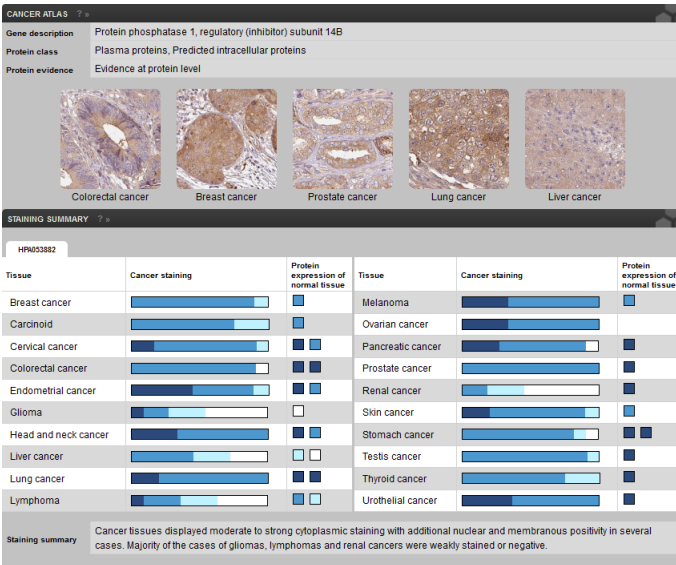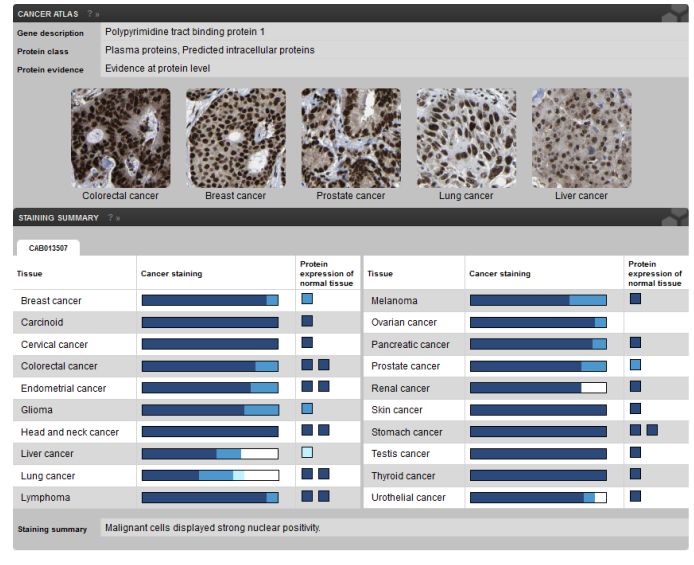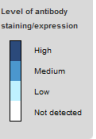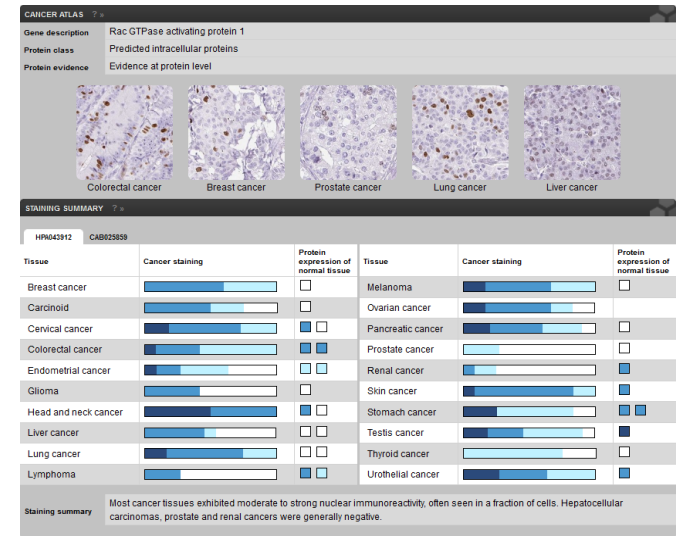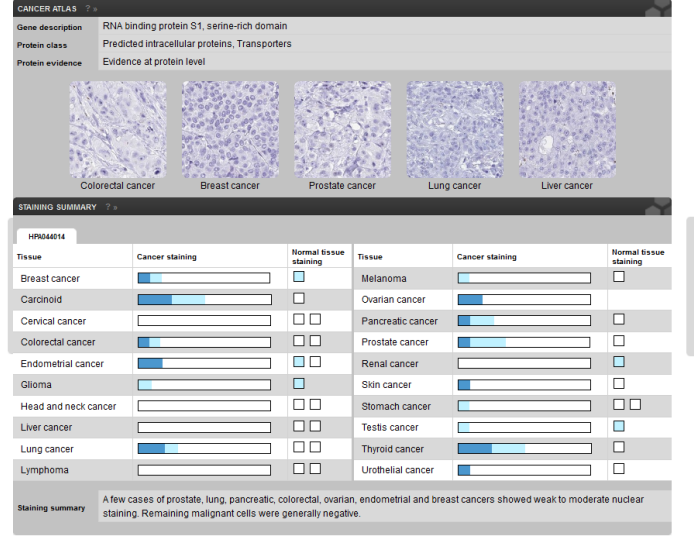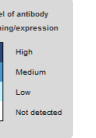

**CANCER ATLAS**

Gene description: Ribosomal protein L36a  
 Protein class: Predicted intracellular proteins, Ribosomal proteins  
 Protein evidence: Evidence at protein level

Colorectal cancer Breast cancer Prostate cancer Lung cancer Liver cancer

**STAINING SUMMARY**

HP063979

| Tissue               | Cancer staining | Normal tissue staining | Tissue            | Cancer staining | Normal tissue staining |
|----------------------|-----------------|------------------------|-------------------|-----------------|------------------------|
| Breast cancer        | Low             | Not detected           | Melanoma          | Low             | Not detected           |
| Cardioid             | Not detected    | Not detected           | Ovarian cancer    | Not detected    | Not detected           |
| Cervical cancer      | Low             | Not detected           | Pancreatic cancer | Low             | Not detected           |
| Colorectal cancer    | Low             | Not detected           | Prostate cancer   | Low             | Not detected           |
| Endometrial cancer   | Low             | Not detected           | Renal cancer      | Low             | Not detected           |
| Glioma               | High            | Not detected           | Skin cancer       | Low             | Not detected           |
| Head and neck cancer | Low             | Not detected           | Stomach cancer    | Low             | Not detected           |
| Liver cancer         | Low             | Not detected           | Testis cancer     | Low             | Not detected           |
| Lung cancer          | Low             | Not detected           | Thyroid cancer    | Low             | Not detected           |
| Lymphoma             | Not detected    | Not detected           | Urothelial cancer | Low             | Not detected           |

Staining summary: Cases of gliomas displayed strong cytoplasmic staining while a few breast, prostate and liver cancers showed weak to moderate positivity. Remaining cancers were generally negative.

**CANCER ATLAS**

Gene description: Serum amyloid A-like 1  
 Protein class: Predicted intracellular proteins  
 Protein evidence: Evidence at protein level

Colorectal cancer Breast cancer Prostate cancer Lung cancer Liver cancer

**STAINING SUMMARY**

HP062904

| Tissue               | Cancer staining | Normal tissue staining | Tissue            | Cancer staining | Normal tissue staining |
|----------------------|-----------------|------------------------|-------------------|-----------------|------------------------|
| Breast cancer        | High            | Not detected           | Melanoma          | High            | Not detected           |
| Cardioid             | High            | Not detected           | Ovarian cancer    | High            | Not detected           |
| Cervical cancer      | High            | Not detected           | Pancreatic cancer | High            | Not detected           |
| Colorectal cancer    | High            | Not detected           | Prostate cancer   | High            | Not detected           |
| Endometrial cancer   | High            | Not detected           | Renal cancer      | High            | Not detected           |
| Glioma               | High            | Not detected           | Skin cancer       | High            | Not detected           |
| Head and neck cancer | High            | Not detected           | Stomach cancer    | High            | Not detected           |
| Liver cancer         | High            | Not detected           | Testis cancer     | High            | Not detected           |
| Lung cancer          | High            | Not detected           | Thyroid cancer    | High            | Not detected           |
| Lymphoma             | High            | Not detected           | Urothelial cancer | High            | Not detected           |

Staining summary: Malignant cells showed moderate to strong cytoplasmic immunoreactivity. Several non-Hodgkins lymphomas and seminomas were weakly stained or negative.

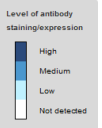

**CANCER ATLAS**

Gene description: Stem-loop binding protein  
 Protein class: Predicted intracellular proteins  
 Protein evidence: Evidence at protein level

Colorectal cancer Breast cancer Prostate cancer Lung cancer Liver cancer

**STAINING SUMMARY**

HP019254

| Tissue               | Cancer staining | Protein expression of normal tissue | Tissue            | Cancer staining | Protein expression of normal tissue |
|----------------------|-----------------|-------------------------------------|-------------------|-----------------|-------------------------------------|
| Breast cancer        | High            | Not detected                        | Melanoma          | High            | Not detected                        |
| Cardioid             | High            | Not detected                        | Ovarian cancer    | High            | Not detected                        |
| Cervical cancer      | High            | Not detected                        | Pancreatic cancer | High            | Not detected                        |
| Colorectal cancer    | High            | Not detected                        | Prostate cancer   | High            | Not detected                        |
| Endometrial cancer   | High            | Not detected                        | Renal cancer      | High            | Not detected                        |
| Glioma               | High            | Not detected                        | Skin cancer       | High            | Not detected                        |
| Head and neck cancer | High            | Not detected                        | Stomach cancer    | High            | Not detected                        |
| Liver cancer         | High            | Not detected                        | Testis cancer     | High            | Not detected                        |
| Lung cancer          | High            | Not detected                        | Thyroid cancer    | High            | Not detected                        |
| Lymphoma             | High            | Not detected                        | Urothelial cancer | High            | Not detected                        |

Staining summary: Cancer cells generally displayed moderate cytoplasmic expression often combined with nuclear staining. Strong nuclear staining was observed in several skin and colorectal cancers.

**CANCER ATLAS**

Gene description: Small nuclear ribonucleoprotein polypeptides B and B1  
 Protein class: Plasma proteins, Predicted intracellular proteins  
 Protein evidence: Evidence at protein level

Colorectal cancer Breast cancer Prostate cancer Lung cancer Urothelial cancer

**STAINING SUMMARY**

HP003482 CAB009610

| Tissue               | Cancer staining | Protein expression of normal tissue | Tissue            | Cancer staining | Protein expression of normal tissue |
|----------------------|-----------------|-------------------------------------|-------------------|-----------------|-------------------------------------|
| Breast cancer        | High            | Not detected                        | Melanoma          | High            | Not detected                        |
| Cardioid             | High            | Not detected                        | Ovarian cancer    | High            | Not detected                        |
| Cervical cancer      | High            | Not detected                        | Pancreatic cancer | High            | Not detected                        |
| Colorectal cancer    | High            | Not detected                        | Prostate cancer   | High            | Not detected                        |
| Endometrial cancer   | High            | Not detected                        | Renal cancer      | High            | Not detected                        |
| Glioma               | High            | Not detected                        | Skin cancer       | High            | Not detected                        |
| Head and neck cancer | High            | Not detected                        | Stomach cancer    | High            | Not detected                        |
| Liver cancer         | High            | Not detected                        | Testis cancer     | High            | Not detected                        |
| Lung cancer          | High            | Not detected                        | Thyroid cancer    | High            | Not detected                        |
| Lymphoma             | High            | Not detected                        | Urothelial cancer | High            | Not detected                        |

Staining summary: Malignant cells displayed in general moderate nuclear staining. Fractions of cases in malignant melanomas, testicular, urothelial and renal cancers were strongly positive.

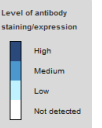

**CANCER ATLAS**

Gene description: Suppressor of variegation 4-20 homolog 2 (Drosophila)  
 Protein class: Enzymes, Predicted intracellular proteins  
 Protein evidence: Evidence at protein level

Colorectal cancer Breast cancer Prostate cancer Lung cancer

**STAINING SUMMARY**

HP052284

| Tissue               | Cancer staining | Normal tissue staining | Tissue            | Cancer staining | Normal tissue staining |
|----------------------|-----------------|------------------------|-------------------|-----------------|------------------------|
| Breast cancer        | High            | Not detected           | Melanoma          | High            | Not detected           |
| Cardioid             | High            | Not detected           | Ovarian cancer    | High            | Not detected           |
| Cervical cancer      | High            | Not detected           | Pancreatic cancer | High            | Not detected           |
| Colorectal cancer    | High            | Not detected           | Prostate cancer   | High            | Not detected           |
| Endometrial cancer   | High            | Not detected           | Renal cancer      | High            | Not detected           |
| Glioma               | High            | Not detected           | Skin cancer       | High            | Not detected           |
| Head and neck cancer | High            | Not detected           | Stomach cancer    | High            | Not detected           |
| Liver cancer         | High            | Not detected           | Testis cancer     | High            | Not detected           |
| Lung cancer          | High            | Not detected           | Thyroid cancer    | High            | Not detected           |
| Lymphoma             | High            | Not detected           | Urothelial cancer | High            | Not detected           |

Staining summary: Several cases of colorectal, endometrial, ovarian, thyroid and squamous cell carcinomas along with few cases of breast, pancreatic, prostate and stomach cancers exhibited moderate to strong cytoplasmic positivity with additional nuclear positivity in several cases. Remaining malignant tissues were weakly stained or negative.

**CANCER ATLAS**

Gene description: Spectrin repeat containing, nuclear envelope 1  
 Protein class: Cancer-related genes, Cytoskeleton related proteins, Disease related genes, Plasma proteins, Predicted intracellular proteins, Predicted membrane proteins  
 Protein evidence: Evidence at protein level

Colorectal cancer Breast cancer Prostate cancer Lung cancer Glioma

**STAINING SUMMARY**

HP019115

| Tissue               | Cancer staining | Normal tissue staining | Tissue            | Cancer staining | Normal tissue staining |
|----------------------|-----------------|------------------------|-------------------|-----------------|------------------------|
| Breast cancer        | High            | Not detected           | Melanoma          | High            | Not detected           |
| Cardioid             | High            | Not detected           | Ovarian cancer    | High            | Not detected           |
| Cervical cancer      | High            | Not detected           | Pancreatic cancer | High            | Not detected           |
| Colorectal cancer    | High            | Not detected           | Prostate cancer   | High            | Not detected           |
| Endometrial cancer   | High            | Not detected           | Renal cancer      | High            | Not detected           |
| Glioma               | High            | Not detected           | Skin cancer       | High            | Not detected           |
| Head and neck cancer | High            | Not detected           | Stomach cancer    | High            | Not detected           |
| Liver cancer         | High            | Not detected           | Testis cancer     | High            | Not detected           |
| Lung cancer          | High            | Not detected           | Thyroid cancer    | High            | Not detected           |
| Lymphoma             | High            | Not detected           | Urothelial cancer | High            | Not detected           |

Staining summary: Malignant cells displayed moderate cytoplasmic and nuclear membrane positivity. Strong positivity was seen in several cases of malignant gliomas. Most prostate cancers were negative or weakly stained.

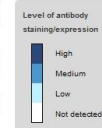



**CANCER ATLAS** [?](#)

Gene description: Synapjanin 2 binding protein  
 Protein class: Mitochondrial proteins, Predicted membrane proteins  
 Protein evidence: Evidence at protein level

Colorectal cancer Breast cancer Prostate cancer Lung cancer Liver cancer

**STAINING SUMMARY** [?](#)

HPA00086

| Tissue               | Cancer staining | Protein expression of normal tissue | Tissue            | Cancer staining | Protein expression of normal tissue |
|----------------------|-----------------|-------------------------------------|-------------------|-----------------|-------------------------------------|
| Breast cancer        |                 |                                     | Melanoma          |                 |                                     |
| Carcinoid            |                 |                                     | Ovarian cancer    |                 |                                     |
| Cervical cancer      |                 |                                     | Pancreatic cancer |                 |                                     |
| Colorectal cancer    |                 |                                     | Prostate cancer   |                 |                                     |
| Endometrial cancer   |                 |                                     | Renal cancer      |                 |                                     |
| Glioma               |                 |                                     | Skin cancer       |                 |                                     |
| Head and neck cancer |                 |                                     | Stomach cancer    |                 |                                     |
| Liver cancer         |                 |                                     | Testis cancer     |                 |                                     |
| Lung cancer          |                 |                                     | Thyroid cancer    |                 |                                     |
| Lymphoma             |                 |                                     | Urothelial cancer |                 |                                     |

Staining summary: A majority of tumors displayed moderate cytoplasmic positivity with a granular pattern. Strongest staining was observed in prostate and liver cancers, while lymphomas, gliomas and squamous cell carcinomas generally were negative.

**CANCER ATLAS** [?](#)

Gene description: Transcription factor 3  
 Protein class: Cancer-related genes, Disease related genes, Plasma proteins, Predicted intracellular proteins, Transcription factors  
 Protein evidence: Evidence at protein level

Colorectal cancer Breast cancer Prostate cancer Lung cancer Lymphoma

**STAINING SUMMARY** [?](#)

HPA04903 HPA02475 CAB018351

| Tissue               | Cancer staining | Protein expression of normal tissue | Tissue            | Cancer staining | Protein expression of normal tissue |
|----------------------|-----------------|-------------------------------------|-------------------|-----------------|-------------------------------------|
| Breast cancer        |                 |                                     | Melanoma          |                 |                                     |
| Carcinoid            |                 |                                     | Ovarian cancer    |                 |                                     |
| Cervical cancer      |                 |                                     | Pancreatic cancer |                 |                                     |
| Colorectal cancer    |                 |                                     | Prostate cancer   |                 |                                     |
| Endometrial cancer   |                 |                                     | Renal cancer      |                 |                                     |
| Glioma               |                 |                                     | Skin cancer       |                 |                                     |
| Head and neck cancer |                 |                                     | Stomach cancer    |                 |                                     |
| Liver cancer         |                 |                                     | Testis cancer     |                 |                                     |
| Lung cancer          |                 |                                     | Thyroid cancer    |                 |                                     |
| Lymphoma             |                 |                                     | Urothelial cancer |                 |                                     |

Staining summary: Most of the cancer cells were either negative or displayed weak nuclear immunoreactivity. Several cases of testis cancers, lymphomas, skin cancers and colorectal cancers showed moderate to strong immunoreactivity.

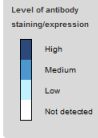

**CANCER ATLAS** [?](#)

Gene description: Telomere maintenance 2  
 Protein class: Predicted intracellular proteins, Predicted membrane proteins  
 Protein evidence: Evidence at protein level

Colorectal cancer Breast cancer Prostate cancer Lung cancer Liver cancer

**STAINING SUMMARY** [?](#)

HPA04148 HPA04173

| Tissue               | Cancer staining | Protein expression of normal tissue | Tissue            | Cancer staining | Protein expression of normal tissue |
|----------------------|-----------------|-------------------------------------|-------------------|-----------------|-------------------------------------|
| Breast cancer        |                 |                                     | Melanoma          |                 |                                     |
| Carcinoid            |                 |                                     | Ovarian cancer    |                 |                                     |
| Cervical cancer      |                 |                                     | Pancreatic cancer |                 |                                     |
| Colorectal cancer    |                 |                                     | Prostate cancer   |                 |                                     |
| Endometrial cancer   |                 |                                     | Renal cancer      |                 |                                     |
| Glioma               |                 |                                     | Skin cancer       |                 |                                     |
| Head and neck cancer |                 |                                     | Stomach cancer    |                 |                                     |
| Liver cancer         |                 |                                     | Testis cancer     |                 |                                     |
| Lung cancer          |                 |                                     | Thyroid cancer    |                 |                                     |
| Lymphoma             |                 |                                     | Urothelial cancer |                 |                                     |

Staining summary: Most of the malignant cells showed moderate cytoplasmic immunoreactivity. Several hepatocellular carcinomas along with a few endometrial, urothelial, gastric, renal and pancreatic cancers were strongly stained.

**CANCER ATLAS** [?](#)

Gene description: Aly/REF export factor  
 Protein class: Plasma proteins, Predicted intracellular proteins  
 Protein evidence: Evidence at protein level

Colorectal cancer Breast cancer Prostate cancer Lung cancer

**STAINING SUMMARY** [?](#)

HPA019793 CAB016281

| Tissue               | Cancer staining | Protein expression of normal tissue | Tissue            | Cancer staining | Protein expression of normal tissue |
|----------------------|-----------------|-------------------------------------|-------------------|-----------------|-------------------------------------|
| Breast cancer        |                 |                                     | Melanoma          |                 |                                     |
| Carcinoid            |                 |                                     | Ovarian cancer    |                 |                                     |
| Cervical cancer      |                 |                                     | Pancreatic cancer |                 |                                     |
| Colorectal cancer    |                 |                                     | Prostate cancer   |                 |                                     |
| Endometrial cancer   |                 |                                     | Renal cancer      |                 |                                     |
| Glioma               |                 |                                     | Skin cancer       |                 |                                     |
| Head and neck cancer |                 |                                     | Stomach cancer    |                 |                                     |
| Liver cancer         |                 |                                     | Testis cancer     |                 |                                     |
| Lung cancer          |                 |                                     | Thyroid cancer    |                 |                                     |
| Lymphoma             |                 |                                     | Urothelial cancer |                 |                                     |

Staining summary: Most malignancies displayed strong nuclear staining, often combined with cytoplasmic positivity.

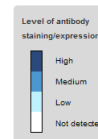

**CANCER ATLAS** [?](#)

Gene description: Transmembrane protein 205  
 Protein class: Predicted membrane proteins  
 Protein evidence: Evidence at protein level

Colorectal cancer Breast cancer Prostate cancer Lung cancer Liver cancer

**STAINING SUMMARY** [?](#)

HPA08540

| Tissue               | Cancer staining | Normal tissue staining | Tissue            | Cancer staining | Normal tissue staining |
|----------------------|-----------------|------------------------|-------------------|-----------------|------------------------|
| Breast cancer        |                 |                        | Melanoma          |                 |                        |
| Carcinoid            |                 |                        | Ovarian cancer    |                 |                        |
| Cervical cancer      |                 |                        | Pancreatic cancer |                 |                        |
| Colorectal cancer    |                 |                        | Prostate cancer   |                 |                        |
| Endometrial cancer   |                 |                        | Renal cancer      |                 |                        |
| Glioma               |                 |                        | Skin cancer       |                 |                        |
| Head and neck cancer |                 |                        | Stomach cancer    |                 |                        |
| Liver cancer         |                 |                        | Testis cancer     |                 |                        |
| Lung cancer          |                 |                        | Thyroid cancer    |                 |                        |
| Lymphoma             |                 |                        | Urothelial cancer |                 |                        |

Staining summary: Most of the malignant cells displayed moderate to strong cytoplasmic positivity. Skin cancers were negative.

**CANCER ATLAS** [?](#)

Gene description: TRAF interacting protein  
 Protein class: Predicted intracellular proteins  
 Protein evidence: Evidence at protein level

Colorectal cancer Breast cancer Prostate cancer Lung cancer Liver cancer

**STAINING SUMMARY** [?](#)

HPA03281 HPA03282

| Tissue               | Cancer staining | Protein expression of normal tissue | Tissue            | Cancer staining | Protein expression of normal tissue |
|----------------------|-----------------|-------------------------------------|-------------------|-----------------|-------------------------------------|
| Breast cancer        |                 |                                     | Melanoma          |                 |                                     |
| Carcinoid            |                 |                                     | Ovarian cancer    |                 |                                     |
| Cervical cancer      |                 |                                     | Pancreatic cancer |                 |                                     |
| Colorectal cancer    |                 |                                     | Prostate cancer   |                 |                                     |
| Endometrial cancer   |                 |                                     | Renal cancer      |                 |                                     |
| Glioma               |                 |                                     | Skin cancer       |                 |                                     |
| Head and neck cancer |                 |                                     | Stomach cancer    |                 |                                     |
| Liver cancer         |                 |                                     | Testis cancer     |                 |                                     |
| Lung cancer          |                 |                                     | Thyroid cancer    |                 |                                     |
| Lymphoma             |                 |                                     | Urothelial cancer |                 |                                     |

Staining summary: Malignant tissues showed moderate cytoplasmic with additional nuclear positivity in many cases. Testicular cancers along with few cases of malignant gliomas, prostate and pancreatic cancers exhibited strong immunoreactivity. Several cases of renal and endometrial cancers were negative.

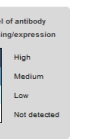

**CANCER ATLAS**

Gene description: TRNA methyltransferase 1 homolog (S. cerevisiae)  
 Protein class: Enzymes, Plasma proteins, Predicted intracellular proteins  
 Protein evidence: Evidence at protein level

Colorectal cancer Breast cancer Prostate cancer Lung cancer Stomach cancer

**STAINING SUMMARY**

HP064130 HP064130

| Tissue               | Cancer staining | Protein expression of normal tissue | Tissue            | Cancer staining | Protein expression of normal tissue |
|----------------------|-----------------|-------------------------------------|-------------------|-----------------|-------------------------------------|
| Breast cancer        | Low             | Not detected                        | Melanoma          | Low             | Not detected                        |
| Carcinoid            | Low             | Not detected                        | Ovarian cancer    | Low             | Not detected                        |
| Cervical cancer      | Low             | Not detected                        | Pancreatic cancer | Low             | Not detected                        |
| Colorectal cancer    | Low             | Not detected                        | Prostate cancer   | Low             | Not detected                        |
| Endometrial cancer   | Low             | Not detected                        | Renal cancer      | Low             | Not detected                        |
| Glioma               | Low             | Not detected                        | Skin cancer       | Low             | Not detected                        |
| Head and neck cancer | Low             | Not detected                        | Stomach cancer    | Low             | Not detected                        |
| Liver cancer         | Low             | Not detected                        | Testis cancer     | Low             | Not detected                        |
| Lung cancer          | Low             | Not detected                        | Thyroid cancer    | Low             | Not detected                        |
| Lymphoma             | Low             | Not detected                        | Urothelial cancer | Low             | Not detected                        |

Staining summary: Most of the malignant cells showed weak to moderate cytoplasmic positivity with occasional nuclear or membranous immunoreactivity. Several cases of malignant lymphomas, gliomas, lung and endometrial cancers were negative.

**CANCER ATLAS**

Gene description: TTK protein kinase  
 Protein class: Enzymes, Plasma proteins, Predicted intracellular proteins  
 Protein evidence: Evidence at protein level

Colorectal cancer Breast cancer Prostate cancer Lung cancer Testis cancer

**STAINING SUMMARY**

HP061624 CAB010166 CAB013229

| Tissue               | Cancer staining | Protein expression of normal tissue | Tissue            | Cancer staining | Protein expression of normal tissue |
|----------------------|-----------------|-------------------------------------|-------------------|-----------------|-------------------------------------|
| Breast cancer        | Low             | Not detected                        | Melanoma          | Low             | Not detected                        |
| Carcinoid            | Low             | Not detected                        | Ovarian cancer    | Low             | Not detected                        |
| Cervical cancer      | Low             | Not detected                        | Pancreatic cancer | Low             | Not detected                        |
| Colorectal cancer    | Low             | Not detected                        | Prostate cancer   | Low             | Not detected                        |
| Endometrial cancer   | Low             | Not detected                        | Renal cancer      | Low             | Not detected                        |
| Glioma               | Low             | Not detected                        | Skin cancer       | Low             | Not detected                        |
| Head and neck cancer | Low             | Not detected                        | Stomach cancer    | Low             | Not detected                        |
| Liver cancer         | Low             | Not detected                        | Testis cancer     | Low             | Not detected                        |
| Lung cancer          | Low             | Not detected                        | Thyroid cancer    | Low             | Not detected                        |
| Lymphoma             | Low             | Not detected                        | Urothelial cancer | Low             | Not detected                        |

Staining summary: Most malignancies showed weak to moderate cytoplasmic staining. A majority of testicular cancers and several malignant lymphomas and colorectal cancers were strongly stained.

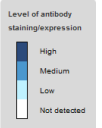

**CANCER ATLAS**

Gene description: WD repeat domain 75  
 Protein class: Predicted intracellular proteins  
 Protein evidence: Evidence at protein level

Colorectal cancer Breast cancer Prostate cancer Lung cancer Liver cancer

**STAINING SUMMARY**

HP032199

| Tissue               | Cancer staining | Normal tissue staining | Tissue            | Cancer staining | Normal tissue staining |
|----------------------|-----------------|------------------------|-------------------|-----------------|------------------------|
| Breast cancer        | Low             | Not detected           | Melanoma          | Low             | Not detected           |
| Carcinoid            | Low             | Not detected           | Ovarian cancer    | Low             | Not detected           |
| Cervical cancer      | Low             | Not detected           | Pancreatic cancer | Low             | Not detected           |
| Colorectal cancer    | Low             | Not detected           | Prostate cancer   | Low             | Not detected           |
| Endometrial cancer   | Low             | Not detected           | Renal cancer      | Low             | Not detected           |
| Glioma               | Low             | Not detected           | Skin cancer       | Low             | Not detected           |
| Head and neck cancer | Low             | Not detected           | Stomach cancer    | Low             | Not detected           |
| Liver cancer         | Low             | Not detected           | Testis cancer     | Low             | Not detected           |
| Lung cancer          | Low             | Not detected           | Thyroid cancer    | Low             | Not detected           |
| Lymphoma             | Low             | Not detected           | Urothelial cancer | Low             | Not detected           |

Staining summary: Most malignant cells showed weak to moderate cytoplasmic and nuclear often nucleolar immunoreactivity. Several cases of prostate cancers and a few duct carcinomas of breast were strongly stained. Most malignant gliomas were negative.

**CANCER ATLAS**

Gene description: Zinc finger CCH-type containing 3  
 Protein class: Predicted intracellular proteins  
 Protein evidence: Evidence at protein level

Colorectal cancer Breast cancer Prostate cancer Lung cancer Liver cancer

**STAINING SUMMARY**

HP022656

| Tissue               | Cancer staining | Protein expression of normal tissue | Tissue            | Cancer staining | Protein expression of normal tissue |
|----------------------|-----------------|-------------------------------------|-------------------|-----------------|-------------------------------------|
| Breast cancer        | Low             | Not detected                        | Melanoma          | Low             | Not detected                        |
| Carcinoid            | Low             | Not detected                        | Ovarian cancer    | Low             | Not detected                        |
| Cervical cancer      | Low             | Not detected                        | Pancreatic cancer | Low             | Not detected                        |
| Colorectal cancer    | Low             | Not detected                        | Prostate cancer   | Low             | Not detected                        |
| Endometrial cancer   | Low             | Not detected                        | Renal cancer      | Low             | Not detected                        |
| Glioma               | Low             | Not detected                        | Skin cancer       | Low             | Not detected                        |
| Head and neck cancer | Low             | Not detected                        | Stomach cancer    | Low             | Not detected                        |
| Liver cancer         | Low             | Not detected                        | Testis cancer     | Low             | Not detected                        |
| Lung cancer          | Low             | Not detected                        | Thyroid cancer    | Low             | Not detected                        |
| Lymphoma             | Low             | Not detected                        | Urothelial cancer | Low             | Not detected                        |

Staining summary: A few cases of liver and gastric cancers displayed moderate cytoplasmic positivity while the remaining malignancies were negative or weakly stained.

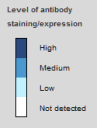

**CANCER ATLAS**

Gene description: Zinc finger protein 688  
 Protein class: Predicted intracellular proteins, Transcription factors  
 Protein evidence: Evidence at protein level

Colorectal cancer Breast cancer Prostate cancer Lung cancer Liver cancer

**STAINING SUMMARY**

HP064368

| Tissue               | Cancer staining | Normal tissue staining | Tissue            | Cancer staining | Normal tissue staining |
|----------------------|-----------------|------------------------|-------------------|-----------------|------------------------|
| Breast cancer        | Low             | Not detected           | Melanoma          | Low             | Not detected           |
| Carcinoid            | Low             | Not detected           | Ovarian cancer    | Low             | Not detected           |
| Cervical cancer      | Low             | Not detected           | Pancreatic cancer | Low             | Not detected           |
| Colorectal cancer    | Low             | Not detected           | Prostate cancer   | Low             | Not detected           |
| Endometrial cancer   | Low             | Not detected           | Renal cancer      | Low             | Not detected           |
| Glioma               | Low             | Not detected           | Skin cancer       | Low             | Not detected           |
| Head and neck cancer | Low             | Not detected           | Stomach cancer    | Low             | Not detected           |
| Liver cancer         | Low             | Not detected           | Testis cancer     | Low             | Not detected           |
| Lung cancer          | Low             | Not detected           | Thyroid cancer    | Low             | Not detected           |
| Lymphoma             | Low             | Not detected           | Urothelial cancer | Low             | Not detected           |

Staining summary: Malignant cells displayed weak to moderate nuclear staining with additional cytoplasmic positivity in several tissues. Membranous positivity was observed in a few cases of colorectal, thyroid and ovarian cancers. A few cases of several malignancies were strongly stained.

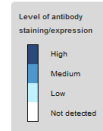

Supplement: peerj-07-6388-s002.pdf [file peerj-07-6388-s002.pdf]
